# Supplementary material for: RNA Secondary Structure Motifs of the Influenza A Virus as Targets for siRNA-Mediated RNA Interference
Source: PubMed Central journal article supplement — Mol Ther Nucleic Acids. 2019 Dec 24;19:627–42. doi: 10.1016/j.omtn.2019.12.018 (PMC6965531; doi:10.1016/j.omtn.2019.12.018), 2019-12-24
Supplement: mmc1.pdf [file mmc1.pdf]

OMTN, Volume 19

## **Supplemental Information**

### **RNA Secondary Structure Motifs of the Influenza A Virus as Targets for siRNA-Mediated RNA Interference**

**Julita Piasecka, Elzbieta Lenartowicz, Marta Soszynska-Jozwiak, Barbara Szutkowska, Ryszard Kierzek, and Elzbieta Kierzek**

**Table S1.** Primers and probe used in the experiments.

|                                                |                                      |
|------------------------------------------------|--------------------------------------|
| Primer for gene-specific reverse transcription |                                      |
|                                                | ATGAGTCTTCTAACCGAGGTTCG              |
| Primers for real-time PCR                      |                                      |
| forward                                        | AGACCAATCTTGTCACCTCTGAC              |
| reverse                                        | AGGGCATTGTTGGACAAAGCGTCTACG          |
| Probe for real-time PCR                        |                                      |
|                                                | FAM-TCACCGTGCCAGTGAGCGAGGACTGC-TAMRA |

All oligonucleotides are DNA. FAM – 5'end labelled with 5-FAM; TAMRA – 3'end labelled with 6-TAMRA.

**Table S2.** Conserved base pairs<sup>1</sup> used as constraints for determination of A/California/04/2009 (H1N1) (+)RNA5 folding in Dynalign mode of RNAstructure 6.1 which were incorporated to guide folding of (+)RNA5 from strain A/Vietnam/1203/2004 (H5N1).

**Table S3.** A/California/04/2009 (H1N1) sequence conservation among influenza type A strains in siRNA target regions.

| siRNA name | Target region* | Sequence conservation (%) |
|------------|----------------|---------------------------|
| 1498       | 1498-1516      | 96.6                      |
| 1342       | 1342-1360      | 76.7                      |
| 1312       | 1312-1330      | 90.0                      |
| 1090       | 1090-1108      | 72.9                      |
| 1008       | 1008-1026      | 88.4                      |
| 901        | 901-919        | 82.6                      |
| 682        | 682-700        | 79.5                      |
| 613        | 613-631        | 82.7                      |
| 471        | 471-489        | 85.3                      |
| 448        | 448-466        | 92.4                      |
| 412        | 412-430        | 89.9                      |
| 183        | 183-201        | 92.5                      |

\* (+)RNA5 nucleotide numbering from 5' end

**Table S4.** Thermodynamic parameters of duplex formation<sup>a</sup>

| siRNA    | Average of curve fits           |                           |                                      |                 | $T_M^{-1}$ vs log $C_T$ plots   |                           |                                      |                 |                                            |                        |
|----------|---------------------------------|---------------------------|--------------------------------------|-----------------|---------------------------------|---------------------------|--------------------------------------|-----------------|--------------------------------------------|------------------------|
|          | $-\Delta H^\circ$<br>(kcal/mol) | $-\Delta S^\circ$<br>(eu) | $-\Delta G^\circ_{37}$<br>(kcal/mol) | $T_M^b$<br>(°C) | $-\Delta H^\circ$<br>(kcal/mol) | $-\Delta S^\circ$<br>(eu) | $-\Delta G^\circ_{37}$<br>(kcal/mol) | $T_M^b$<br>(°C) | $-\Delta\Delta G^\circ_{37}$<br>(kcal/mol) | $\Delta T_M^b$<br>(°C) |
| 183      | 143.9 ± 6.08                    | 398.3 ± 18.1              | 20.38 ± 0.51                         | 70.0            | 98.8 ± 4.2                      | 265.3 ± 12.5              | 16.59 ± 0.36                         | 72.1            | 0                                          | 0                      |
| 183-sF1  | 86.09 ± 5.891                   | 229.8 ± 17.3              | 14.80 ± 0.52                         | 69.9            | 91.6 ± 4.9                      | 246.4 ± 14.7              | 15.26 ± 0.39                         | 69.6            | 1.33                                       | -2.5                   |
| 183-sF2  | 151.0 ± 18.7                    | 411.4 ± 54.9              | 23.43 ± 1.72                         | 76.1            | 99.03 ± 8.9                     | 261.1 ± 25.9              | 18.04 ± 0.95                         | 77.8            | -1.45                                      | 5.7                    |
| 471      | 161.6 ± 9.4                     | 440.2 ± 27.1              | 25.08 ± 0.99                         | 77.2            | 158.12 ± 14.2                   | 430.1 ± 41.0              | 24.70 ± 1.51                         | 77.3            | 0                                          | 0                      |
| 471-sMe1 | 62.3 ± 4.7                      | 161.5 ± 14.5              | 12.28 ± 0.29                         | 68.5            | 64.7 ± 14.1                     | 168.4 ± 42.2              | 12.48 ± 1.30                         | 68.4            | 12.22                                      | -8.9                   |
| 471-sF1  | 80.6 ± 4.9                      | 210.3 ± 14.0              | 15.46 ± 0.63                         | 75.6            | 85.6 ± 14.8                     | 224.6 ± 43.1              | 15.93 ± 1.49                         | 75.2            | 8.77                                       | -2.1                   |
| 471-sF2  | 144.7 ± 9.7                     | 385.8 ± 27.8              | 25.10 ± 1.18                         | 82.6            | 143.6 ± 29.6                    | 382.6 ± 83.4              | 24.98 ± 3.83                         | 82.7            | -0.28                                      | 5.4                    |
| 613      | 156.8 ± 6.1                     | 433.0 ± 17.9              | 22.58 ± 0.58                         | 72.3            | 143.7 ± 10.3                    | 394.3 ± 30.4              | 21.39 ± 0.94                         | 72.8            | 0                                          | 0                      |
| 613-sMe2 | 60.3 ± 4.9                      | 159.51 ± 14.7             | 10.82 ± 0.42                         | 60.8            | 63.6 ± 7.9                      | 169.5 ± 24.1              | 11.02 ± 0.51                         | 60.5            | 10.37                                      | -12.3                  |
| 613-sF1  | 163.2 ± 8.0                     | 444.5 ± 23.0              | 25.34 ± 0.89                         | 77.4            | 168.3 ± 25.0                    | 459.3 ± 72.0              | 25.91 ± 2.73                         | 77.3            | -4.52                                      | 4.5                    |
| 613-aF1  | 127.8 ± 14.5                    | 337.86 ± 41.2             | 23.02 ± 1.76                         | 82.9            | 126.9 ± 17.7                    | 335.3 ± 50.5              | 22.96 ± 2.15                         | 83.1            | -1.57                                      | 10.3                   |
| 613-asF1 | 181.5 ± 1.1                     | 483.9 ± 3.0               | 31.49 ± 0.22                         | 86.4            | 136.8 ± 0.1                     | 357.8 ± 0.1               | 25.87 ± 0.01                         | 88.1            | -4.48                                      | 15.3                   |
| 613-sPS  | 160.9 ± 7.6                     | 445.2 ± 22.6              | 22.82 ± 0.67                         | 71.9            | 159.1 ± 24.5                    | 439.9 ± 71.6              | 22.68 ± 2.40                         | 72.0            | -1.29                                      | -0.8                   |
| 613-aPS  | 167.8 ± 25.2                    | 465.3 ± 73.5              | 23.47 ± 2.38                         | 71.8            | 150.0 ± 15.2                    | 413.1 ± 44.5              | 21.88 ± 1.40                         | 72.4            | -0.49                                      | -0.4                   |
| 613-asPS | 151.8 ± 7.3                     | 418.6 ± 21.6              | 21.99 ± 0.67                         | 72.1            | 150.6 ± 19.5                    | 415.1 ± 56.8              | 21.90 ± 1.89                         | 72.2            | -0.51                                      | -0.6                   |

a – solutions: 100 mM NaCl, 20 mM sodium cacodylate, 0.5 mM Na<sub>2</sub>EDTA, pH 7, b - calculated for 10<sup>-4</sup> M oligomer concentration.

## REFERENCE

1. Soszynska-Jozwiak, M, Michalak, P, Moss, WN, Kierzek, R, Keszy, J, and Kierzek, E (2017). Influenza virus segment 5 (+) RNA - secondary structure and new targets for antiviral strategies. *Sci Rep* **7**: 15041.
